# Supplementary material for: Repositioning of bromocriptine for treatment of acute myeloid leukemia
Source: PubMed Central journal article supplement (PMC5015257; doi:10.1186/s12967-016-1007-5), 2016-09-07
Supplement: 12967_2016_1007_MOESM3_ESM.pdf [file 12967_2016_1007_MOESM3_ESM.pdf]

**A**

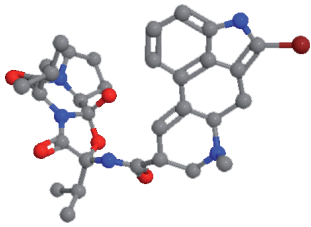

**B**

| Cell line | Origin          | Concentration | Score  |
|-----------|-----------------|---------------|--------|
| HL-60     | AML             | 5 $\mu$ M     | 0,816  |
| MCF7      | Breast cancer   | 5 $\mu$ M     | 0,249  |
| MCF7      | Breast cancer   | 5 $\mu$ M     | 0,230  |
| PC3       | Prostate cancer | 5 $\mu$ M     | 0,000  |
| PC3       | Prostate cancer | 5 $\mu$ M     | -0,482 |
