# Supplementary material for: Repositioning of bromocriptine for treatment of acute myeloid leukemia
Source: PubMed Central journal article supplement (PMC5015257; doi:10.1186/s12967-016-1007-5), 2016-09-07

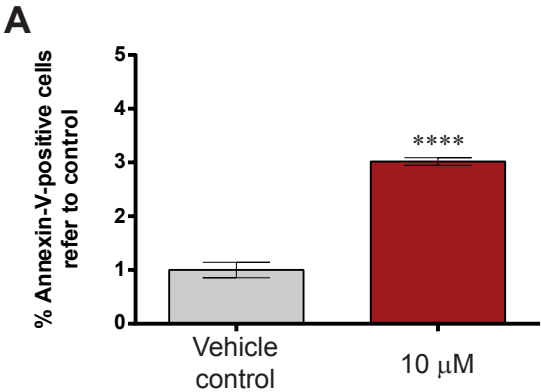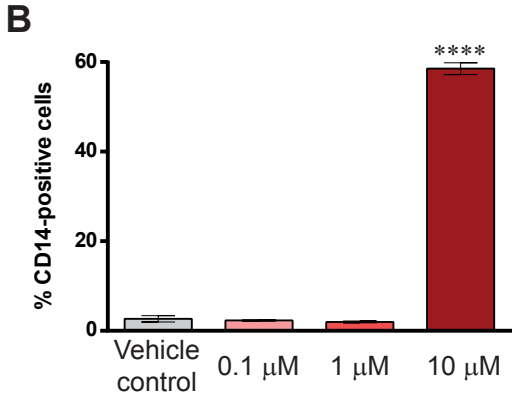

Supplement: 12967_2016_1007_MOESM4_ESM.pdf [file 12967_2016_1007_MOESM4_ESM.pdf]
